# Supplementary material for: Screening and discovery of nitro-benzoxadiazole compounds activating epidermal growth factor receptor (EGFR) in cancer cells
Source: PubMed Central journal article supplement — Sci Rep. 2014 Feb 5;4:3977. doi: 10.1038/srep03977 (PMC3913914; doi:10.1038/srep03977), 2014-02-05
Supplement: srep03977-s1.pdf [file srep03977-s1.pdf]

## Screening and discovery of nitro-benzoxadiazole compounds activating epidermal growth factor receptor (EGFR) in cancer cells

Vehary Sakanyan<sup>1,2,\*</sup>, Marie Angelini<sup>1</sup>, Mickael Le Béhec<sup>3</sup>, Michèle Françoise Lecocq<sup>1</sup>, Florence Benaiteau<sup>2</sup>, Bénédicte Rousseau<sup>2</sup>, Aram Gyulkhandanyan<sup>4</sup>, Lusine Gyulkhandanyan<sup>4</sup>, Cédric Logé<sup>2</sup>, Eric Reiter<sup>5</sup>, Christos Roussakis<sup>2</sup> & Fabrice Fleury<sup>3</sup>

### Legends to Figures

**Supplementary Fig. 1.** Diagram of DNA cloning of domain-specific regions of human sEGFR.

Each DNA sequence coding one of the four sEGFR domains was amplified by PCR and cloned into pENTR/D-Topo vector to create entry clones in the *Escherichia coli* DH5 $\alpha$  strain. The resulting recombinant plasmids carrying the domains I, II or IV, and designated DI, DII, and DIV respectively (the region DIII was impossible to clone), fused with the N-terminal His-tag of the destination vector pDEST17, were transferred into the *E. coli* BL21 AI strain for overexpression and purification of proteins.

**Supplementary Fig. 2.** Kinetics of protein tyrosine phosphorylation in breast cancer cells exposed to NSC 228155.

The MDA MB468 cells were grown in DMEM with 10% FBS, deprived of serum for 24 h, and exposed to 100  $\mu$ M of the compound for a specified length of time. Changes in tyrosine phosphorylation and abundance of EGFR were assessed by immunoblotting with anti-pTyr P100, anti-pEGFR-Y1068, and anti-EGFR (cytoplasmic domain) antibodies.

**Supplementary Fig. 3.** Dose-dependent effect of NSC 228155 and determination of the EC<sub>50</sub> value in MDA MB468 cells.

The cells were grown in DMEM and, after serum-starvation for 24 h, were incubated with different concentrations of NSC 228155 for 1 h. **a**, immunodetection with anti-phospho-EGFR pY1068 and anti-EGFR antibodies. The fluorescence intensity data were collected and quantified with Odyssey software (Li-COR). **b**, EGFR phosphorylation plots were generated by fitting the fluorescence intensity, measured at each treatment time point relative to the untreated cells, using Origin software (OriginLab Corporation).

**Supplementary Fig. 4.** Dose-response of NSC 228155 and EGF-induced signaling in MDA MB468 cells.

The cells were serum-starved for 4 hours, and then exposed to increasing doses of NSC 228155 (from 0.1 to 10  $\mu$ M) for 10 or 30 minutes, or to increasing doses of EGF (from 5 to 500 nM) for 10 minutes. After stimulation, total cell lysates were subjected to SDS-PAGE. Phosphorylated ERK1/2 (Thr202/Tyr204) and EGFR (Tyr1173) were detected using selective antibodies followed by chemiluminescence. Anti-ERK2 antibody was used to monitor gel loading and to evaluate the signal ratio of protein bands.

**a**, Representative immunoblots of ligand-induced ERK1/2, and EGFR phosphorylation in MDA MB 468 cells. Phosphorylated ERK 1/2 (**b**) and EGFR (**c**) signals were quantified and normalized *versus* ERK2. In each case, the maximum response was arbitrarily taken to be 100%. The data are means  $\pm$  SEM from 3 independent experiments.

**Supplementary Fig. 5.** Tyrosine phosphorylation at EGFR in NSCLC-N6-L16 cells treated with NSC 228155.

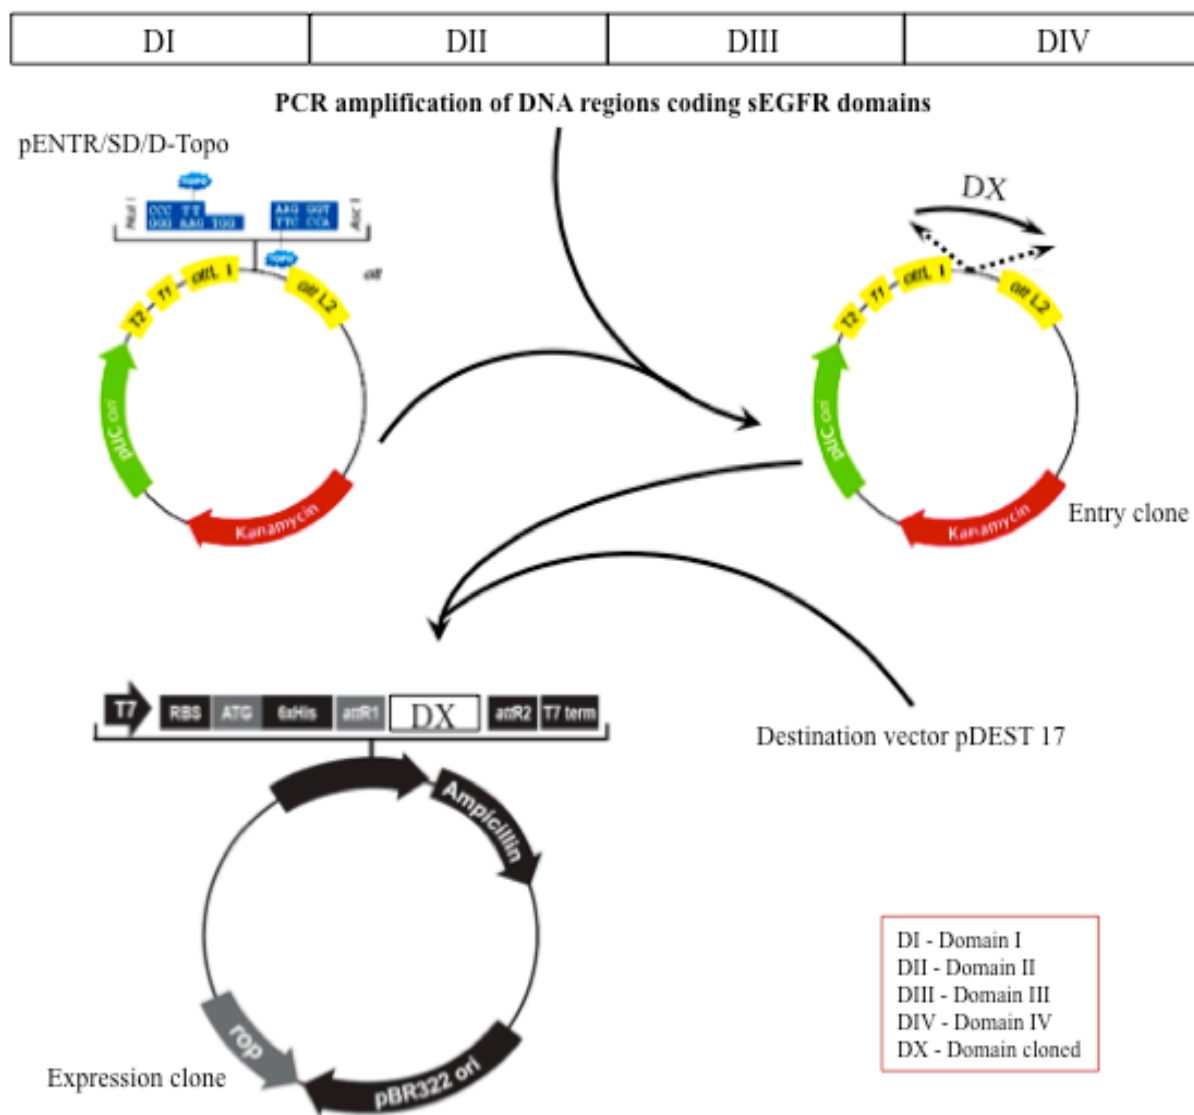

**Supplementary Fig. 1.**

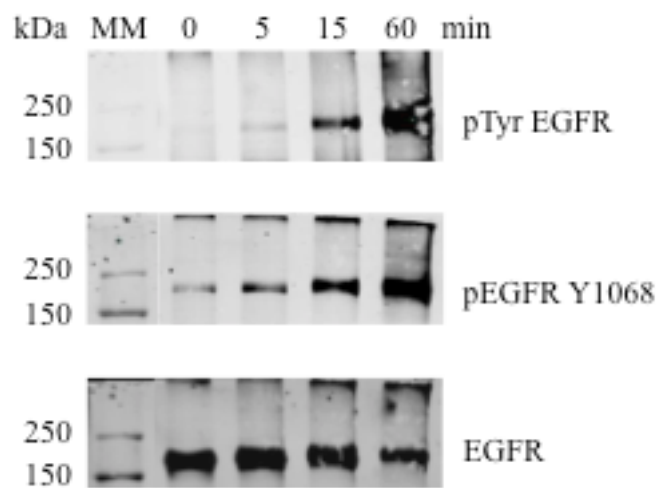

**Supplementary Fig. 2.**

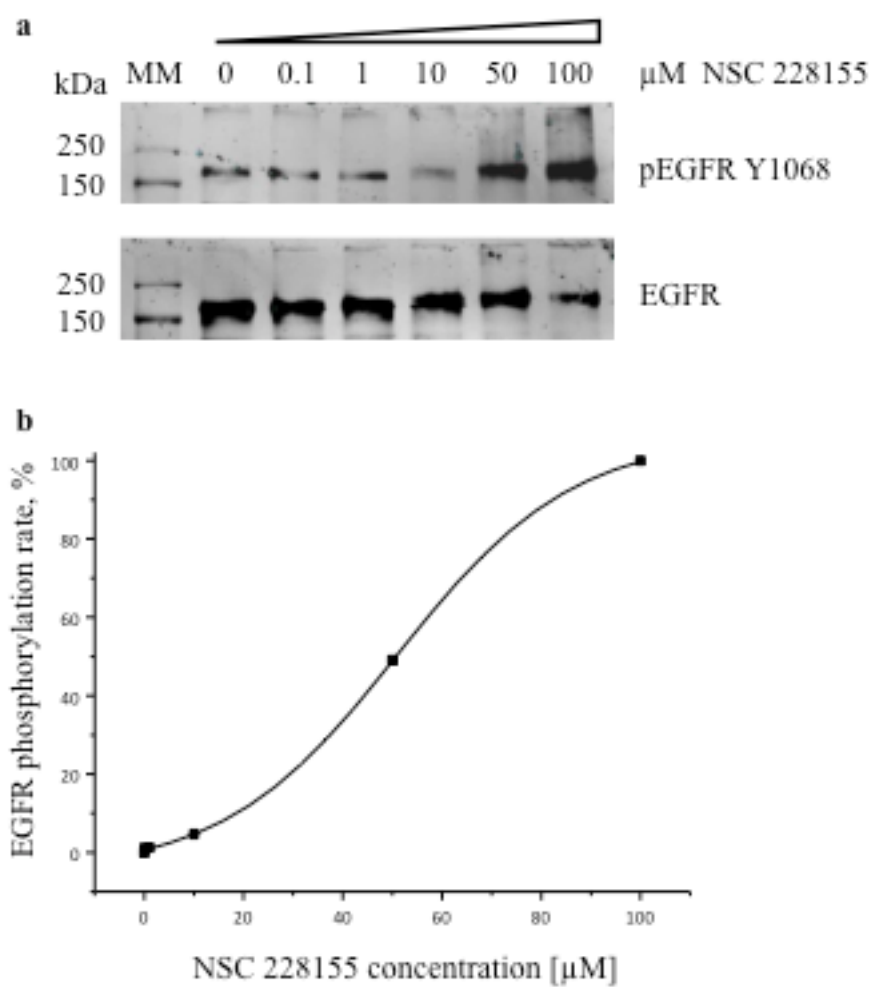

**Supplementary Fig. 3.**

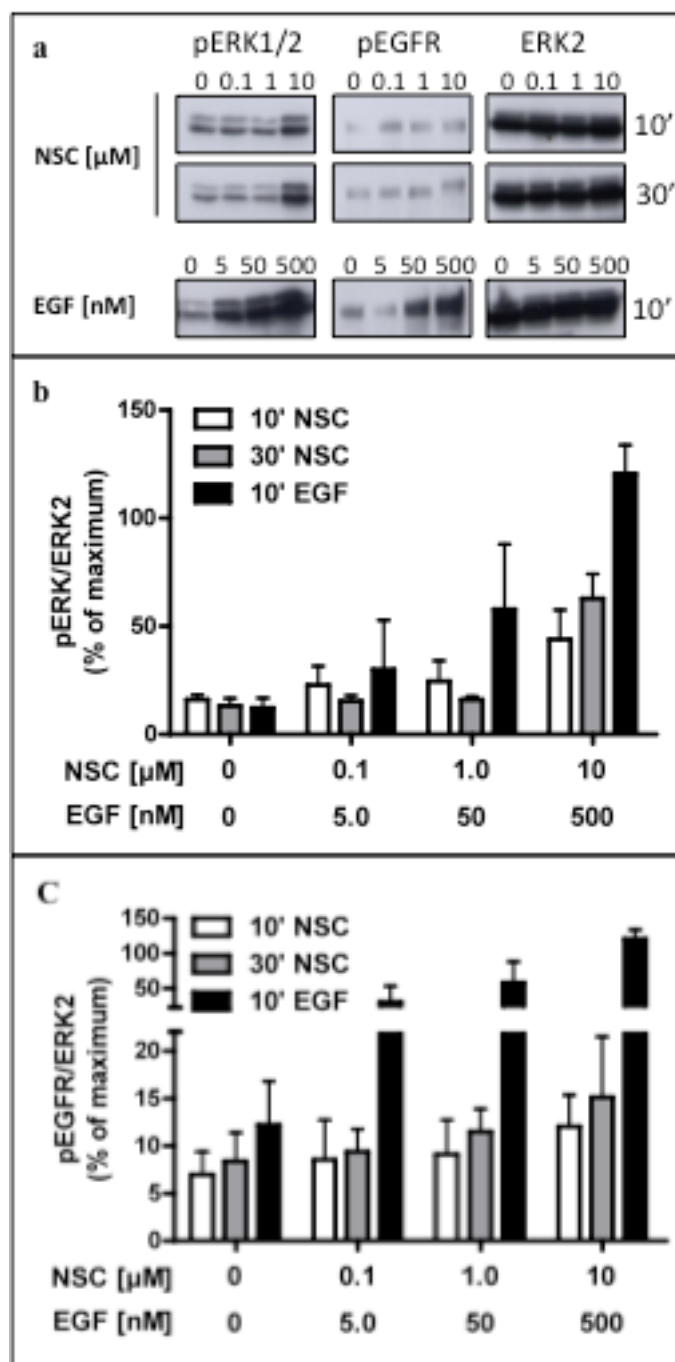

Supplementary Fig. 4.

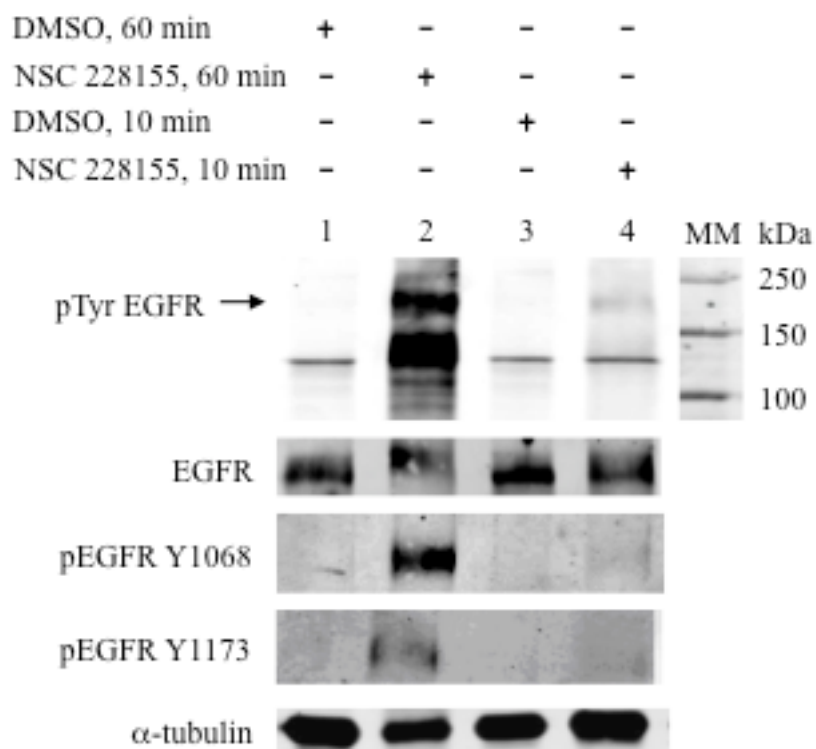

Supplementary Fig. 5.
